# Supplementary material for: The influence of different N-substituted groups on the mechanochromic properties of 1,4-dihydropyridine derivatives with simple structures
Source: Royal Society of Chemistry journal article supplement (doi:10.1039/c7ra09515e), 2017-01-01
Supplement: c7ra09515e1.pdf [file c7ra09515e1.pdf]

## Electronic Supplementary Information

### The influence of different *N*-substituted groups on the mechanochromic properties of 1,4-dihydropyridine derivatives with simple structure

Yibin Zhou,<sup>a</sup> Lebin Qian,<sup>a</sup> Miaochang Liu,<sup>a</sup> Ge Wu,<sup>b</sup> Wenxia Gao,<sup>a</sup> Jinchang Ding,<sup>a</sup> Xiaobo Huang\*<sup>a</sup> and Huayue Wu\*<sup>a</sup>

<sup>a</sup>College of Chemistry and Materials Engineering, Wenzhou University, Wenzhou 325035, P. R. China

<sup>b</sup>School of Pharmacy, Wenzhou Medical University, Wenzhou 325035, P. R. China

E-mail: xiaobhuang@wzu.edu.cn (X. Huang) and huayuewu@wzu.edu.cn (H. Wu)

#### Contents:

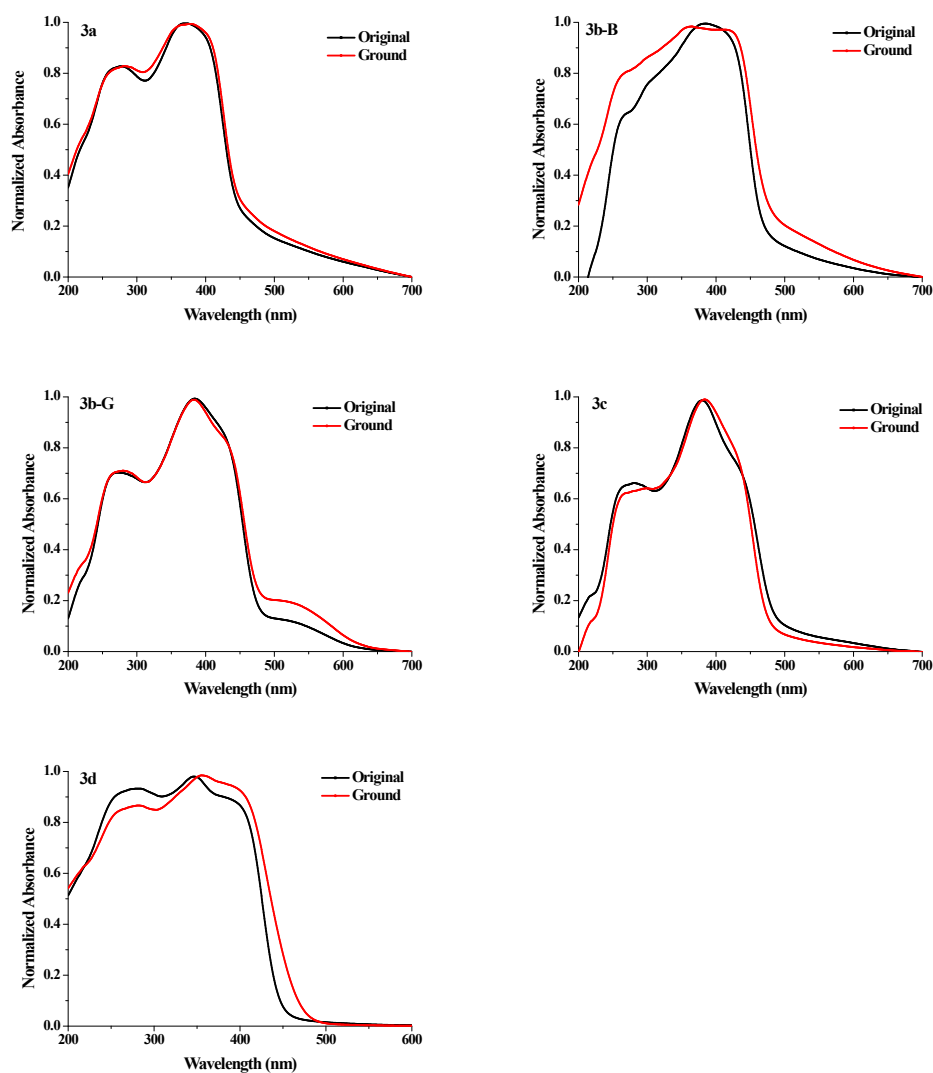

Fig. S1 Normalized absorption spectra of the solid samples of **3a-3d** before and after grinding.

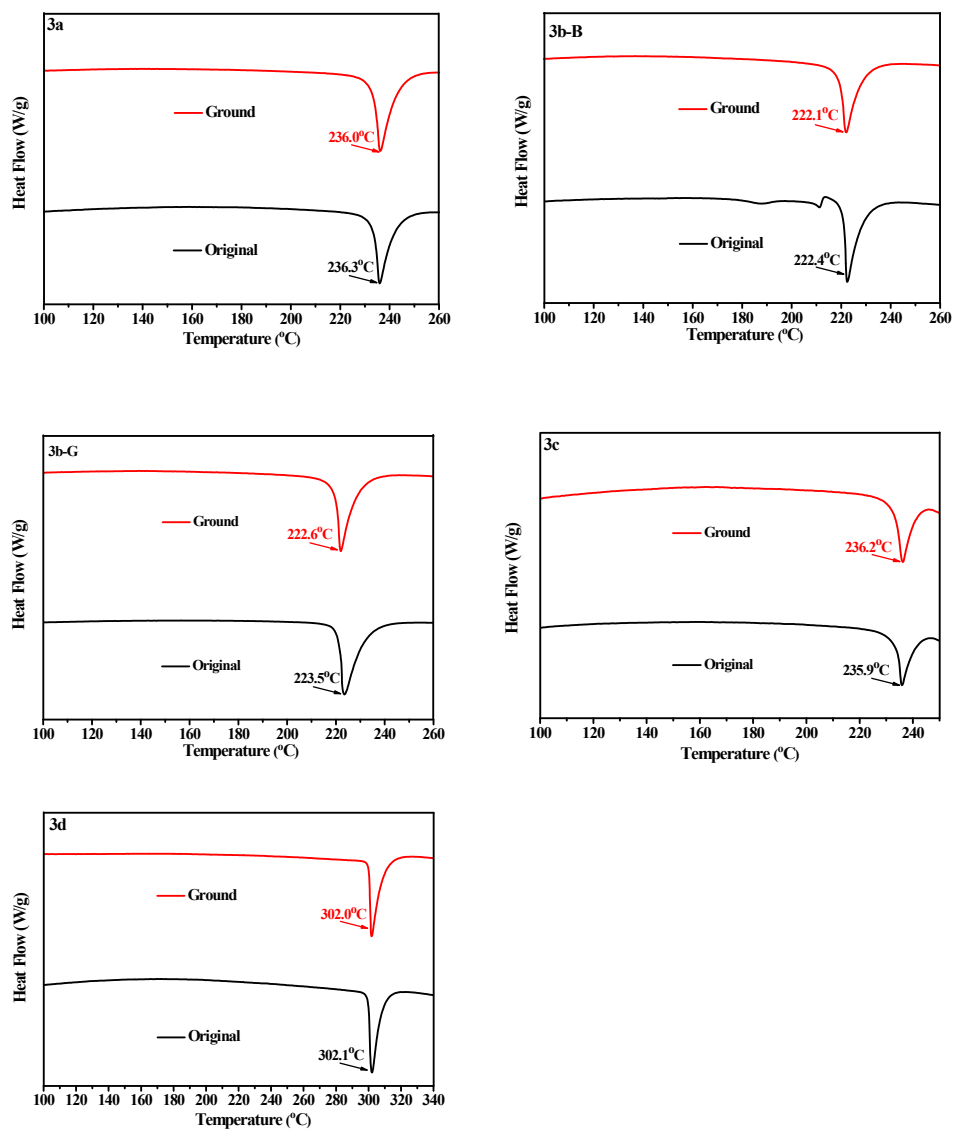

**Fig. S2** Comparison of DSC curves of the original samples of **3a-3d** before and after grinding.

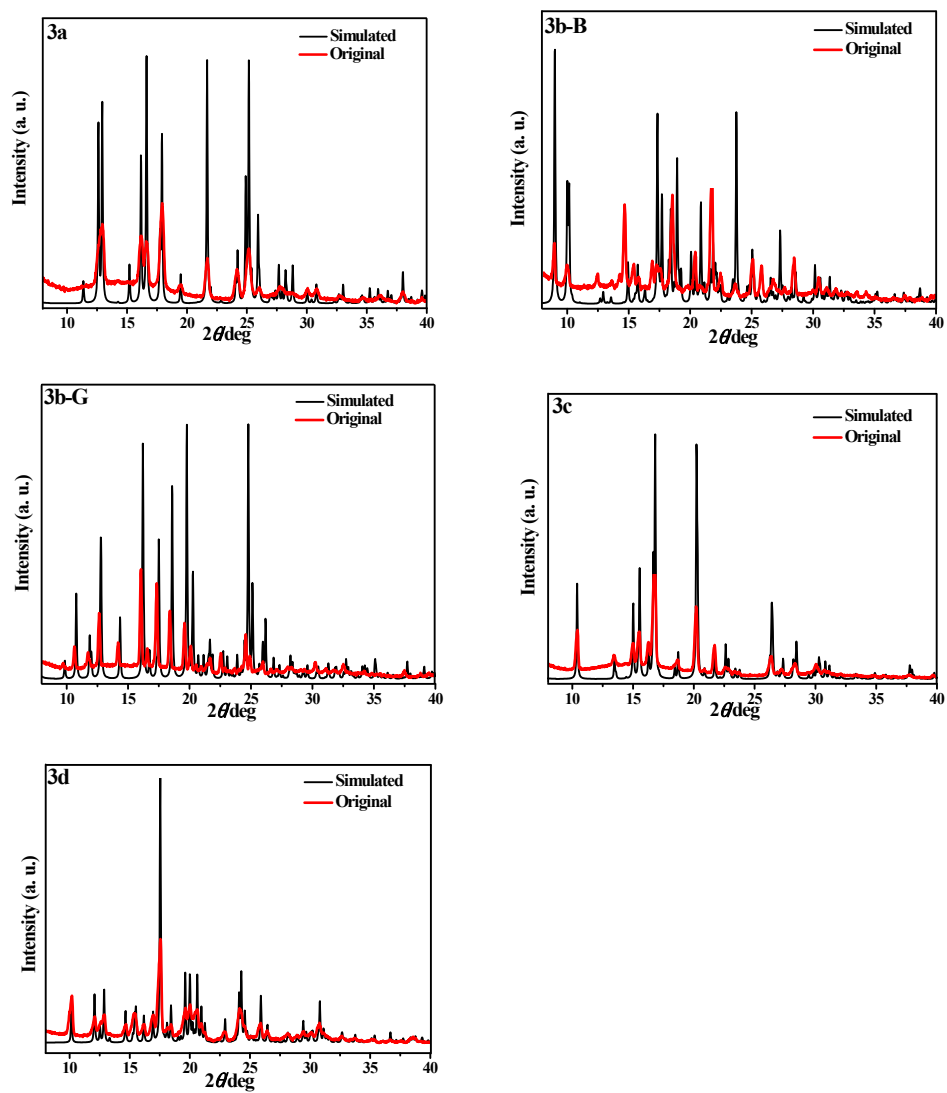

**Fig. S3** Comparison of XRD curves of the original samples of **3a-3d** and the corresponding simulated curves obtained from the single crystals.

**Table S1** The selected crystal data of compounds **3a-3d**.

|                                                | <b>3a</b>                                       | <b>3b-B</b>                                                   | <b>3b-G</b>                                     | <b>3c</b>                                       | <b>3d</b>                                       |
|------------------------------------------------|-------------------------------------------------|---------------------------------------------------------------|-------------------------------------------------|-------------------------------------------------|-------------------------------------------------|
| Empirical formula                              | C <sub>17</sub> H <sub>23</sub> NO <sub>2</sub> | C <sub>44</sub> H <sub>58</sub> N <sub>2</sub> O <sub>8</sub> | C <sub>22</sub> H <sub>25</sub> NO <sub>2</sub> | C <sub>23</sub> H <sub>27</sub> NO <sub>2</sub> | C <sub>23</sub> H <sub>27</sub> NO <sub>2</sub> |
| Formula weight                                 | 273.36                                          | 742.92                                                        | 335.43                                          | 349.45                                          | 349.45                                          |
| Temperature (K)                                | 301.83                                          | 293(2)                                                        | 293(2)                                          | 293(2)                                          | 293(2)                                          |
| Crystal system                                 | Orthorhombic                                    | Monoclinic                                                    | Triclinic                                       | Monoclinic                                      | Monoclinic                                      |
| Space group                                    | <i>Pna</i> 2 <sub>1</sub>                       | <i>P</i> 2(1)/ <i>c</i>                                       | <i>P</i> $\bar{1}$                              | <i>P</i> 2 <sub>1</sub>                         | <i>P</i> 2(1)/ <i>c</i>                         |
| <i>Z</i>                                       | 4                                               | 4                                                             | 2                                               | 2                                               | 4                                               |
| <i>D</i> <sub>calcd</sub> [Mg/m <sup>3</sup> ] | 1.222                                           | 1.218                                                         | 1.221                                           | 1.183                                           | 1.196                                           |
| <i>F</i> (000)                                 | 592                                             | 1600                                                          | 360                                             | 376                                             | 752                                             |
| $\theta$ range [°]                             | 3.500-25.999                                    | 1.048-24.999                                                  | 2.270-24.999                                    | 1.661-25.490                                    | 2.052-24.997                                    |
| <i>R</i> <sub>1</sub> [I>2 $\sigma$ (I)]       | 0.0859                                          | 0.0683                                                        | 0.0776                                          | 0.0575                                          | 0.0487                                          |
| <i>wR</i> <sub>2</sub> [I>2 $\sigma$ (I)]      | 0.2017                                          | 0.1687                                                        | 0.2184                                          | 0.1551                                          | 0.1263                                          |
| <i>a</i> [Å]                                   | 8.1907(5)                                       | 19.4307(19)                                                   | 8.6562(3)                                       | 6.7838(11)                                      | 17.439(3)                                       |
| <i>b</i> [Å]                                   | 24.8299(16)                                     | 17.6059(16)                                                   | 9.3060(3)                                       | 11.793(2)                                       | 12.082(2)                                       |
| <i>c</i> [Å]                                   | 7.3077(5)                                       | 11.8488(12)                                                   | 12.0490(4)                                      | 12.664(2)                                       | 9.2298(16)                                      |
| $\alpha$ [deg]                                 | 90                                              | 90                                                            | 83.1427(10)                                     | 90                                              | 90                                              |
| $\beta$ [deg]                                  | 90                                              | 91.348(2)                                                     | 77.2334(10)                                     | 104.498(4)                                      | 93.491(4)                                       |
| $\gamma$ [deg]                                 | 90                                              | 90                                                            | 75.0473(11)                                     | 90                                              | 90                                              |
| <i>V</i> [Å <sup>3</sup> ]                     | 1486.20(17)                                     | 4052.3(7)                                                     | 912.55(5)                                       | 980.9                                           | 1941.2(6)                                       |
| GOF                                            | 1.025                                           | 1.020                                                         | 1.052                                           | 1.040                                           | 1.013                                           |
| R(int)                                         | 0.0872                                          | 0.0516                                                        | 0.0366                                          | 0.0254                                          | 0.0382                                          |
| No. of reflns collected                        | 6521                                            | 22198                                                         | 23873                                           | 5676                                            | 10438                                           |
| No. of unique reflns                           | 2769                                            | 7122                                                          | 3190                                            | 3466                                            | 3412                                            |
| <i>R</i> <sub>1</sub> (all data)               | 0.1116                                          | 0.1144                                                        | 0.0888                                          | 0.0683                                          | 0.0682                                          |
| <i>wR</i> <sub>2</sub> (all data)              | 0.2239                                          | 0.1990                                                        | 0.2333                                          | 0.1650                                          | 0.1411                                          |

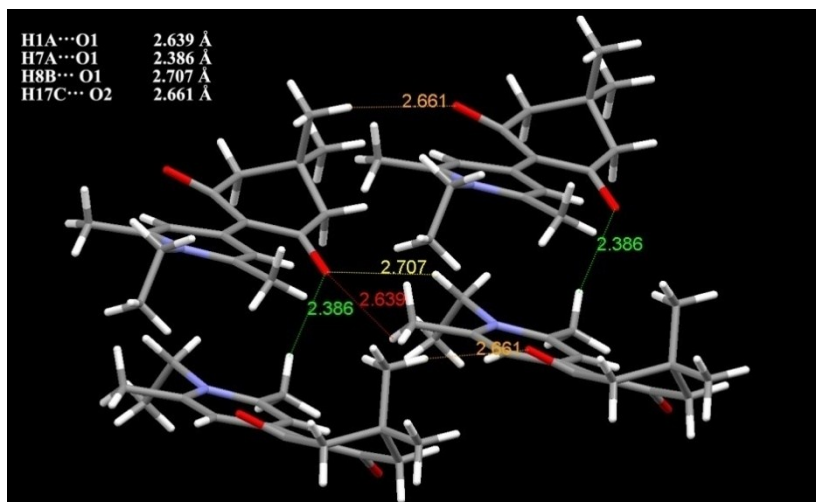

Fig. S4 The intermolecular interactions in the crystals of **3a**.

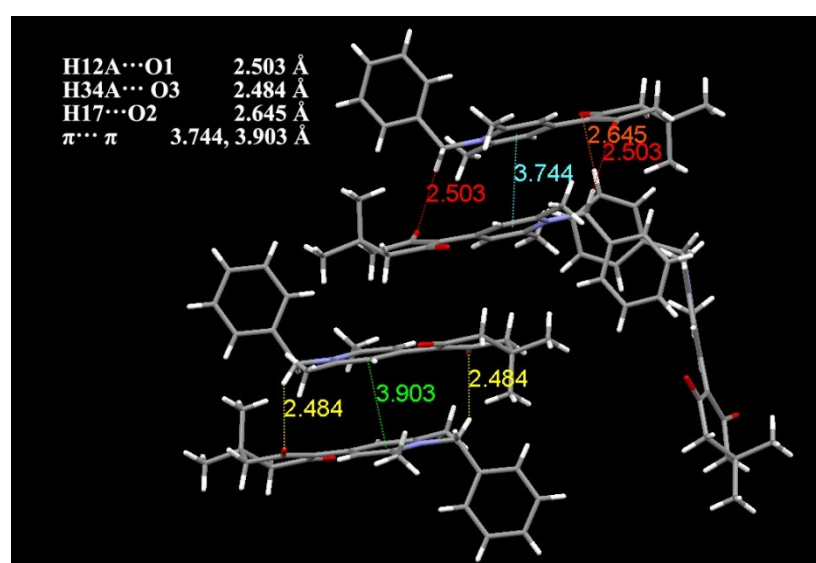

Fig. S5 The intermolecular interactions in the crystals of **3b-B**.

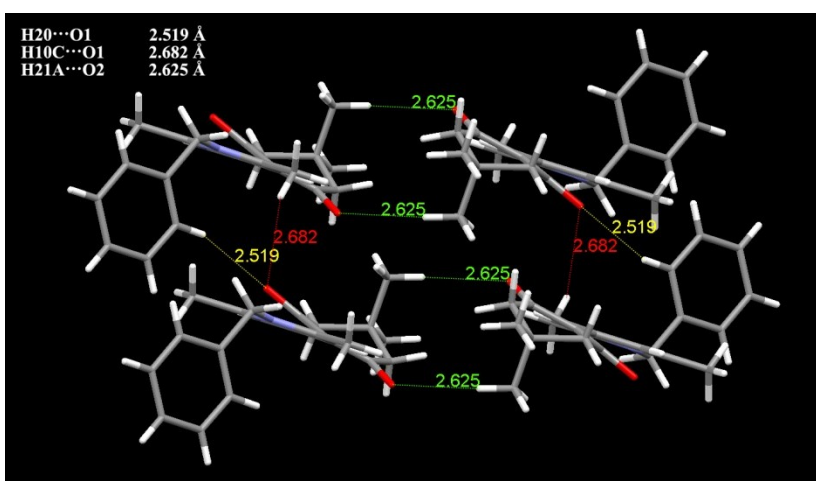

Fig. S6 The intermolecular interactions in the crystals of **3b-G**.

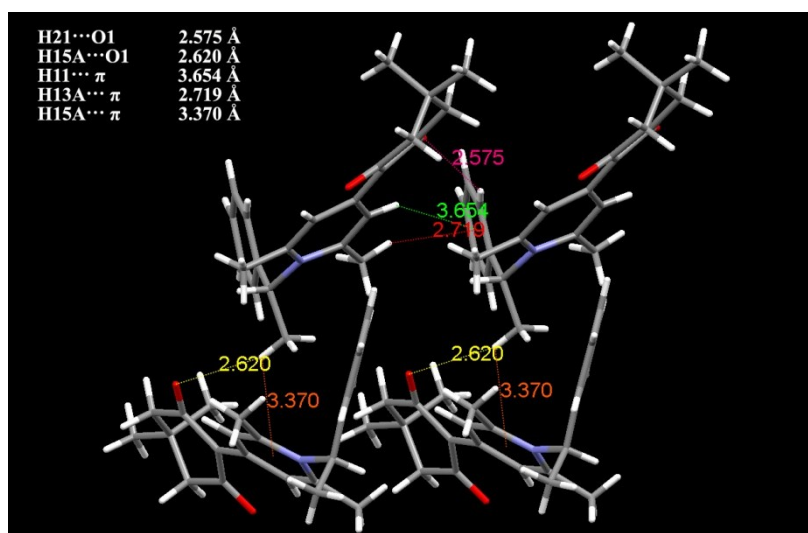

Fig. S7 The intermolecular interactions in the crystals of **3c**.

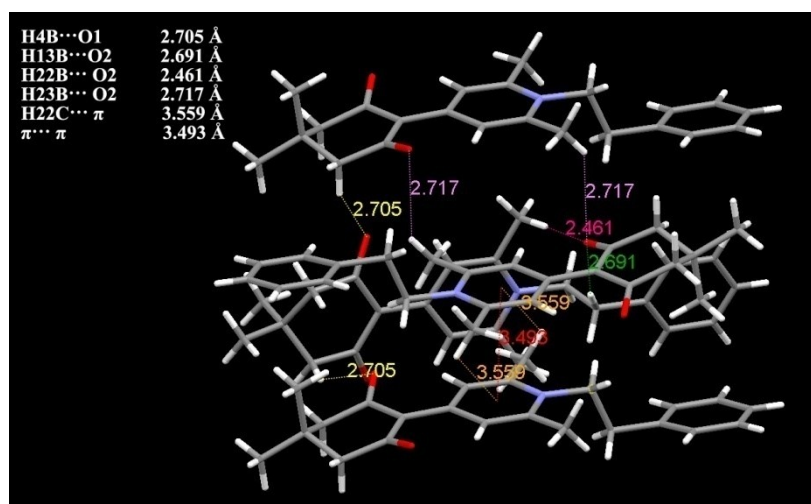

Fig. S8 The intermolecular interactions in the crystals of **3d**.

## NMR spectra of 3a-3d

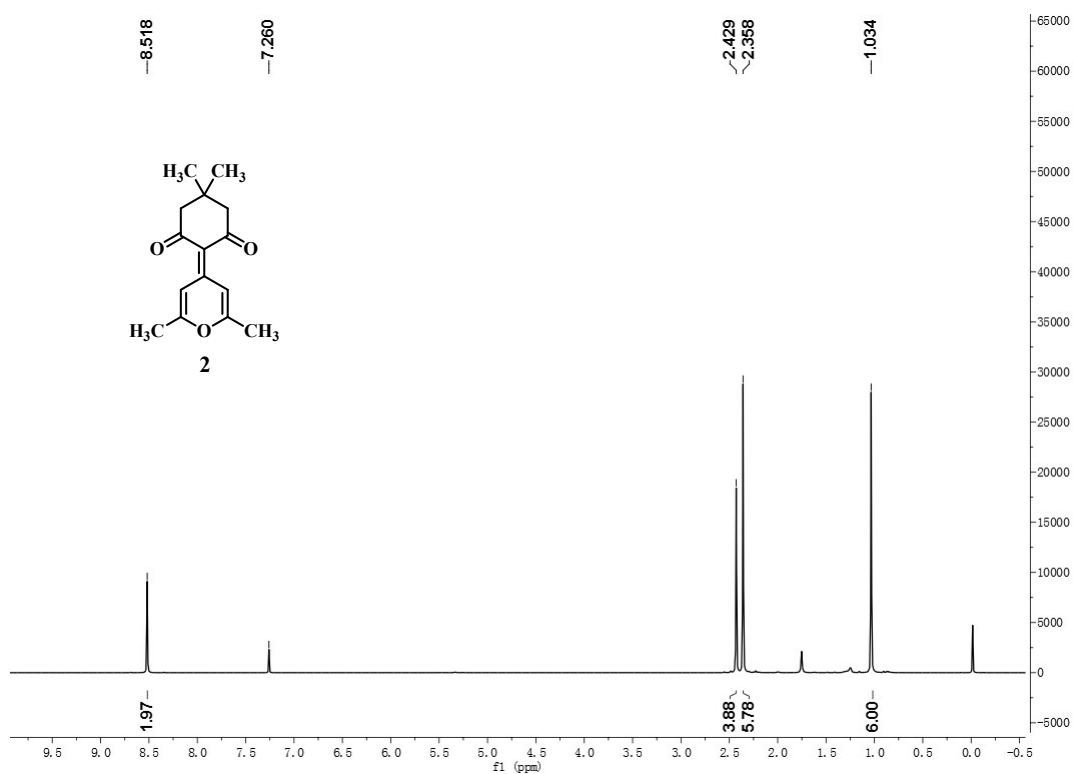

Fig. S9 <sup>1</sup>H NMR of compound 2 (CDCl<sub>3</sub>, 500 MHz).

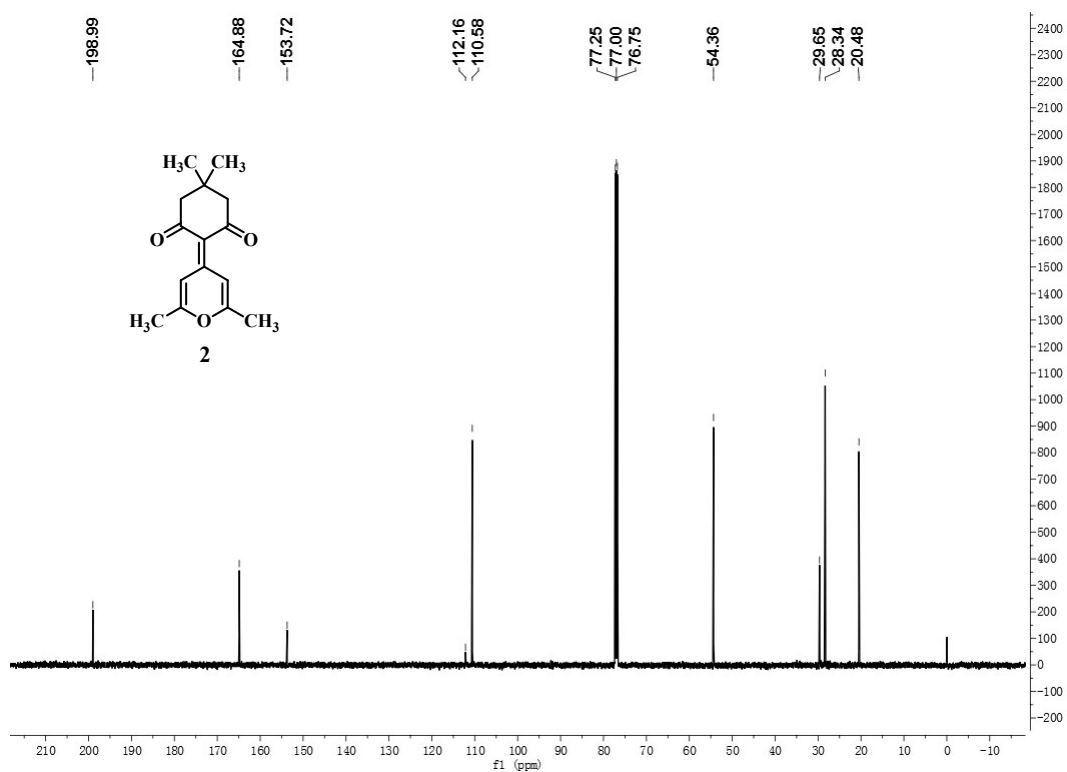

Fig. S10 <sup>13</sup>C NMR of compound 2 (CDCl<sub>3</sub>, 125 MHz).

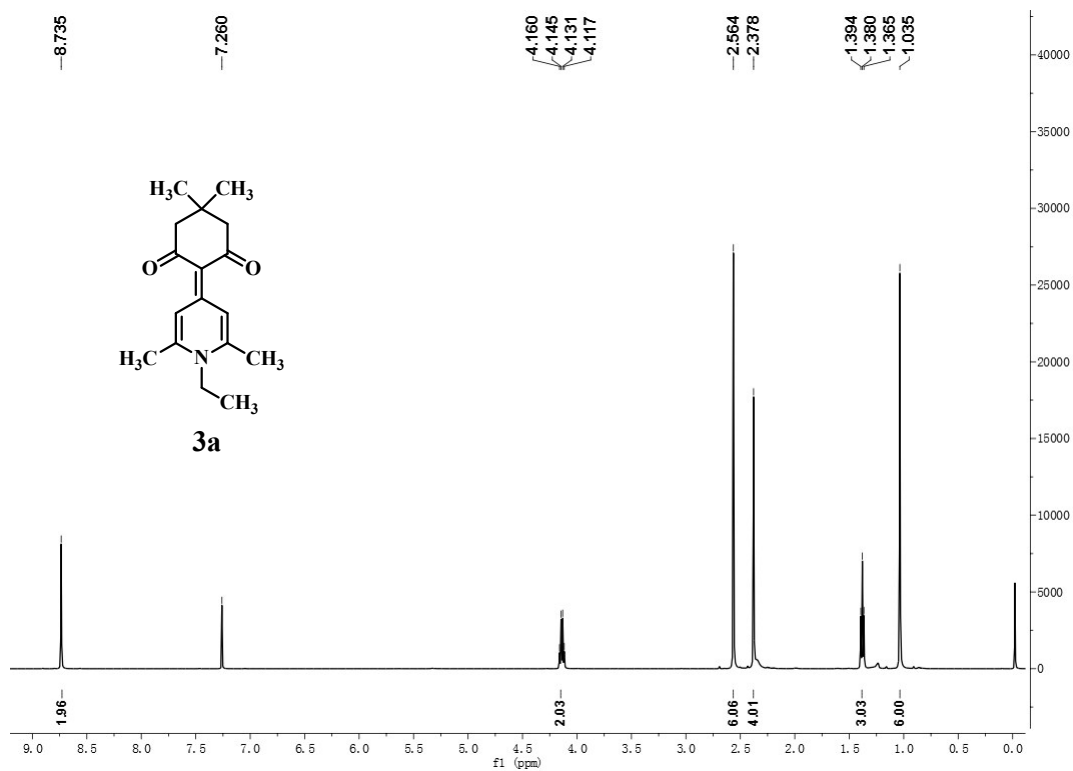

**Fig. S11** <sup>1</sup>H NMR of compound **3a** (CDCl<sub>3</sub>, 500 MHz).

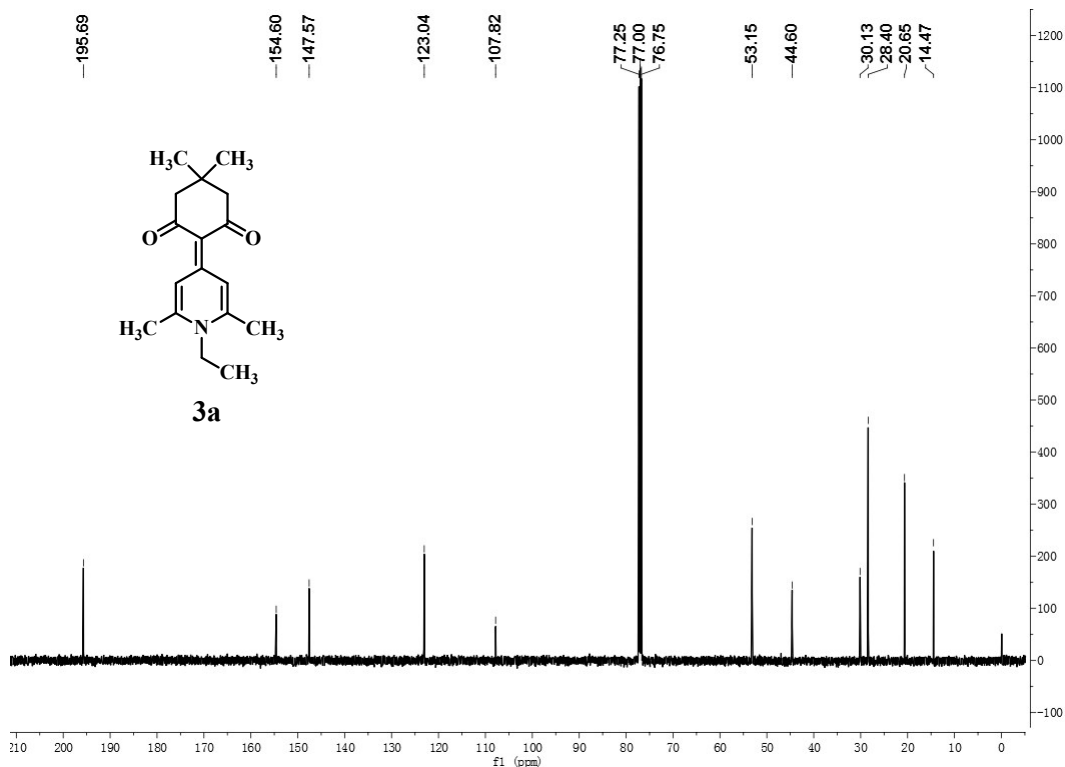

**Fig. S12** <sup>13</sup>C NMR of compound **3a** (CDCl<sub>3</sub>, 125 MHz).



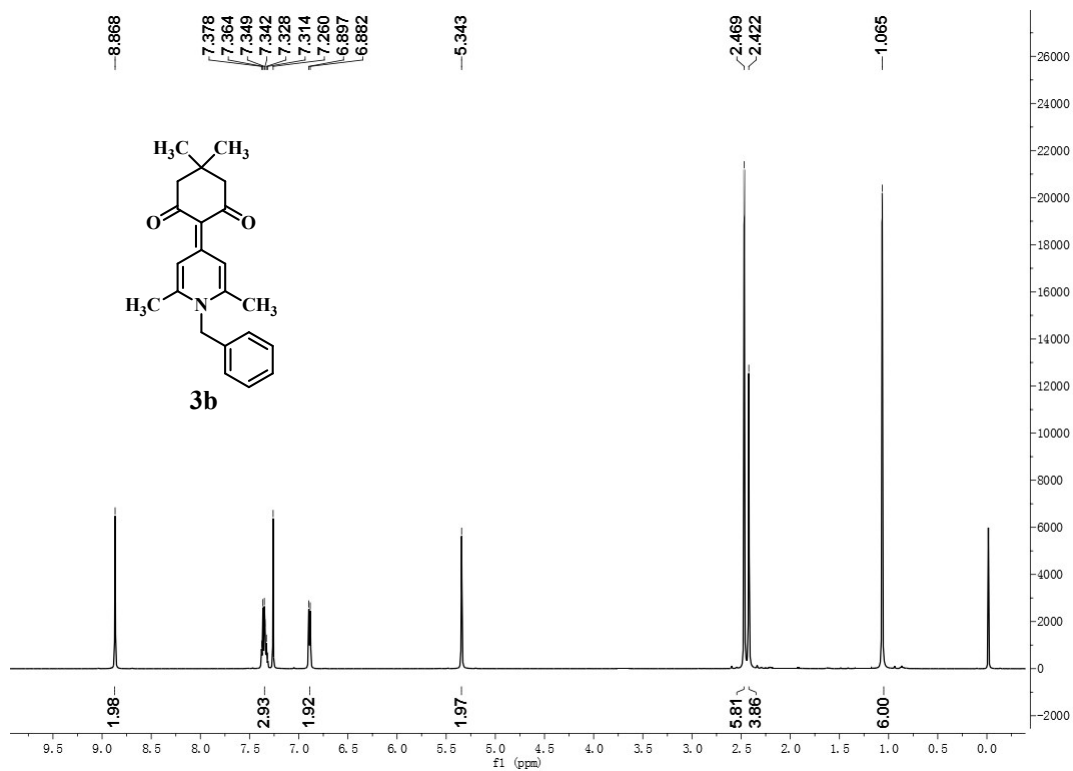

Fig. S13  $^1\text{H}$  NMR of **3b** ( $\text{CDCl}_3$ , 500 MHz).

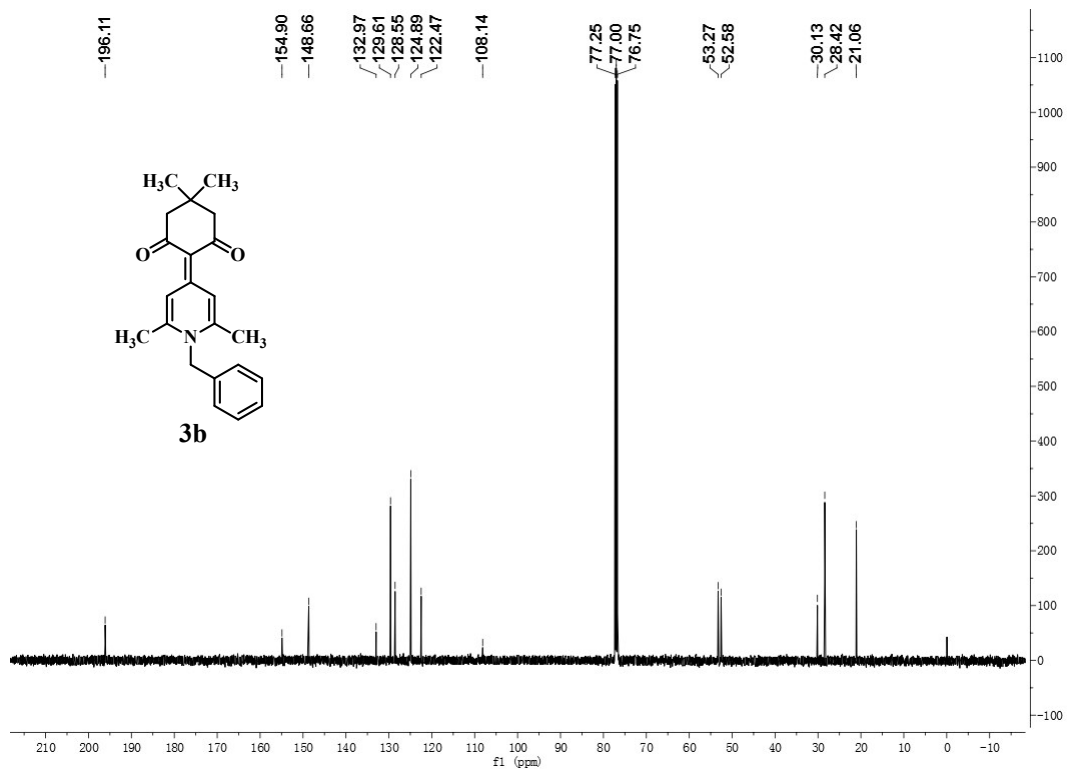

Fig. S14  $^{13}\text{C}$  NMR of **3b** ( $\text{CDCl}_3$ , 125 MHz).

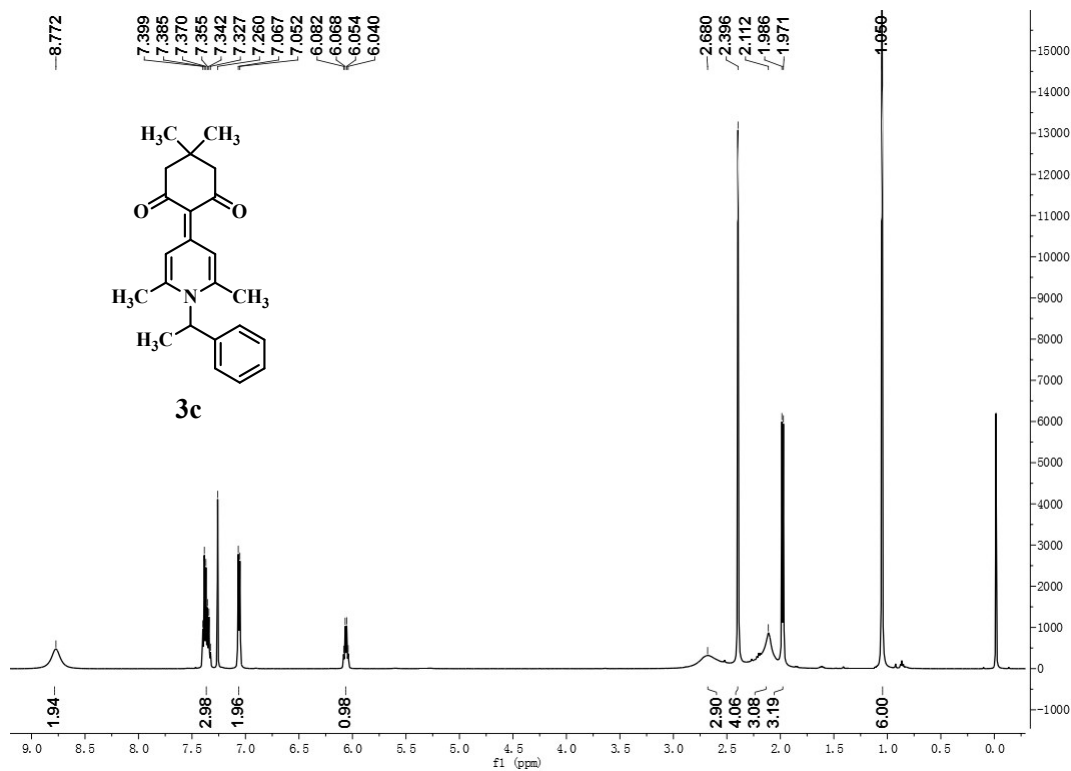

Fig. S15  $^1\text{H}$  NMR of **3c** ( $\text{CDCl}_3$ , 500 MHz).

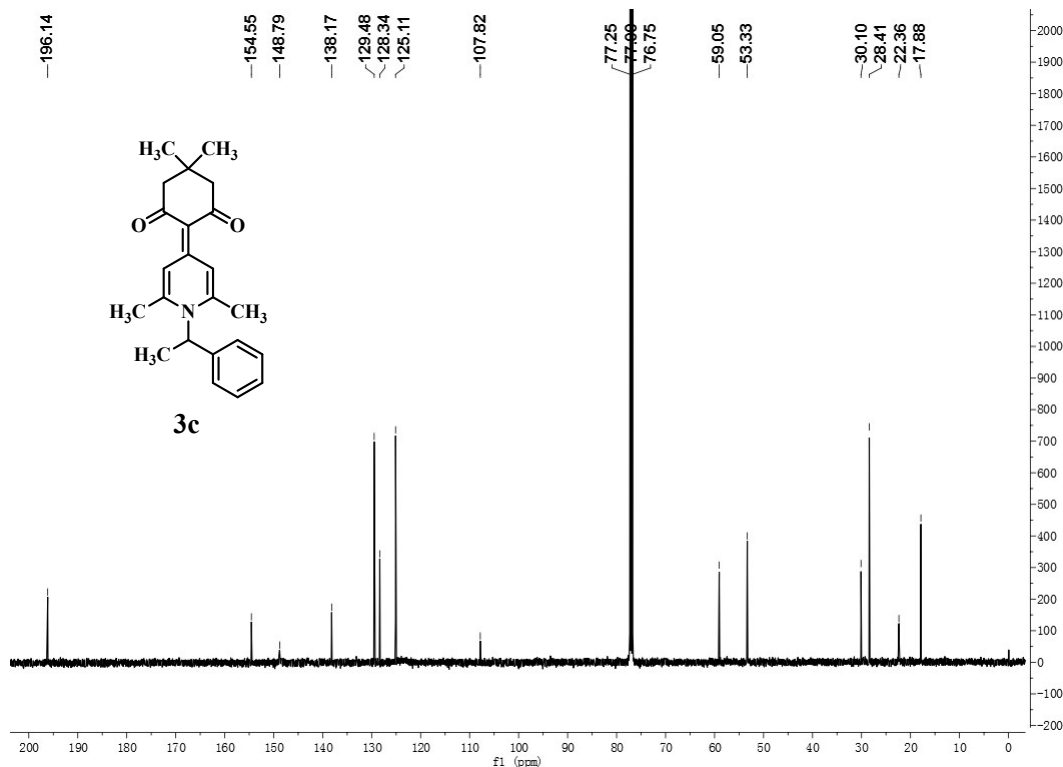

Fig. S16  $^{13}\text{C}$  NMR of **3c** ( $\text{CDCl}_3$ , 500 MHz).

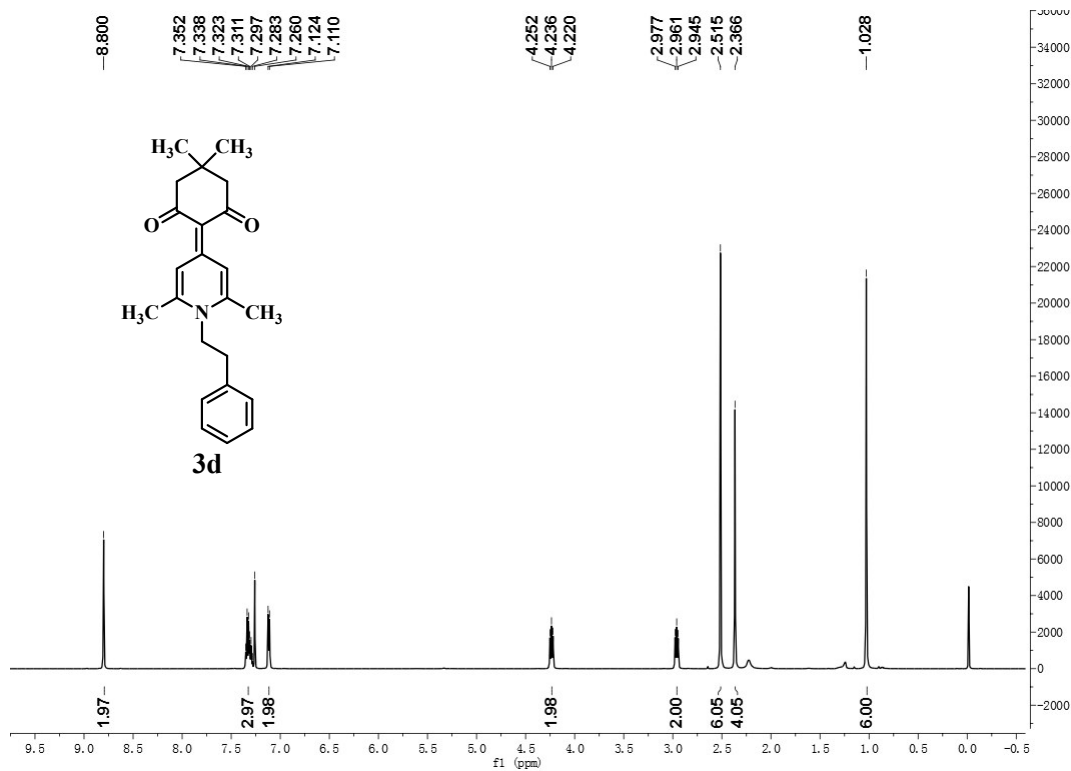

Fig. S17 <sup>1</sup>H NMR of **3d** (CDCl<sub>3</sub>, 500 MHz).

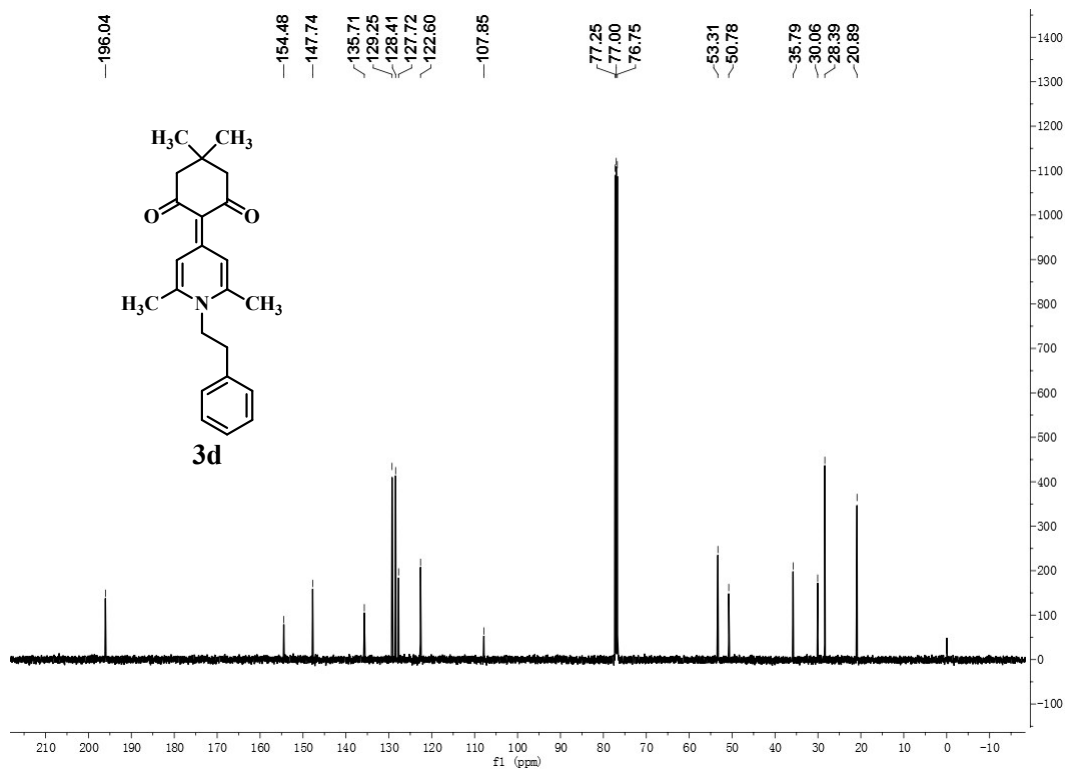

Fig. S18 <sup>13</sup>C NMR of **3d** (CDCl<sub>3</sub>, 125 MHz).
